# Supplementary material for: Hollow crystal generation through polymorphic transformation – a case study of flufenamic acid
Source: Royal Society of Chemistry journal article supplement (doi:10.1039/c7ce01984j), 2017-12-22
Supplement: c7ce01984j1.pdf [file c7ce01984j1.pdf]

## **Hollow crystals generation through polymorphic transformation - A case study of flufenamic acid**

**Nallamothe Bhargavi<sup>a#</sup>, Rahul B Chavan<sup>a#</sup>, Nalini R Shastri<sup>a\*</sup>**

<sup>a</sup>Solid State Pharmaceutical Research Group (SSPRG), Department of Pharmaceutics, National Institute of Pharmaceutical Education and Research (NIPER), Hyderabad, India

<sup>#</sup> Both the authors contributed equally.

<sup>\*</sup>Corresponding author. Dr. Nalini R Shastri

**Tel.** +91-040-23423749

**Fax.** +91-040-23073751

**E-mail:** [nalini@niperhyd.ac.in](mailto:nalini@niperhyd.ac.in), [svcphod@yahoo.co.in](mailto:svcphod@yahoo.co.in)

**Address:** Department of Pharmaceutics, National Institute of Pharmaceutical Education & Research (NIPER), Balanagar, Hyderabad, India, Pin code – 500037

### **Supplementary information**

#### **Basic Pharmaceutical Terms used in the manuscript**

**Dissolution efficiency (DE<sub>60</sub>)** is the area under the dissolution curve up to certain time (here in this study, up to 60 min) expressed as a percentage of the area of the rectangle described by 100% dissolution in the same time.

**Q<sub>60</sub>** is the amount of drug released in 60 min.

**Similarity factor f<sub>2</sub>** –When the two profiles are identical, f<sub>2</sub>= 100. An f<sub>2</sub> value of 50 or greater (50–100) ensures equivalence of the performance of the two products.

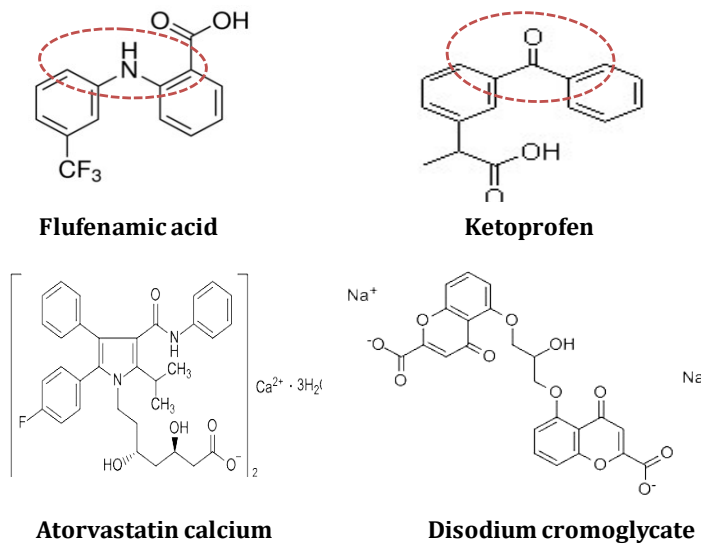

**Figure S1** Chemical structure of drug molecules selected for the study

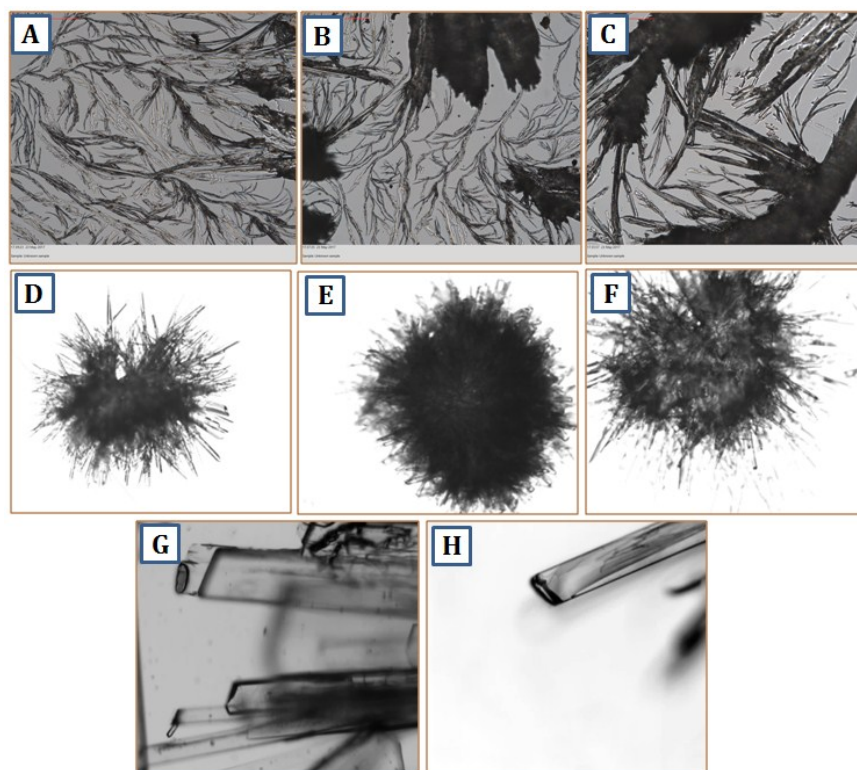

**Figure S2** Optical images of preliminary screening experiment from different solvent/ anti solvent combinations: ketoprofen (A- EtOH/EA, B- EtOH/n-hexane and C- EtOH/Chloroform); atorvastatin calcium (A- EtOH/n-hexane, B- EtOH/EA, and C- EtOH/IPA) and flufenamic acid (A and B- EtOH/EA)

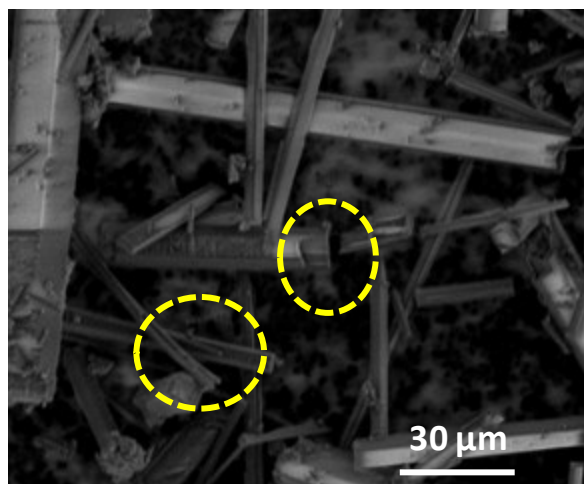

**Figure S3** SEM analysis of hollow crystals of flufenamic acid after blending (750X). Bracket value is the magnification.

**Table S1** Qualitative solubility data of flufenamic acid

| <b>Solvent</b>    | <b>Solubility (mg/mL) at RT</b> |
|-------------------|---------------------------------|
| Ethanol           | 5                               |
| Acetone           | 5                               |
| Methanol          | 0.8                             |
| Chloroform        | 1                               |
| Isopropyl alcohol | 0.8                             |
| Acetonitrile      | 1                               |
| Ethyl acetate     | 0.8                             |

**Table S2** Well's protocol for compressibility study

| <b>Sample amount</b>                                  | <b>500 mg +5 mg magnesium stearate</b> |          |          |
|-------------------------------------------------------|----------------------------------------|----------|----------|
|                                                       | <b>A</b>                               | <b>B</b> | <b>C</b> |
| Blending time                                         | 5 min                                  | 5 min    | 30 min   |
| Compression using 13 mm die at 250 kg/cm <sup>2</sup> |                                        |          |          |
| Dwell time                                            | 2 s                                    | 30 s     | 2 s      |
